# Supplementary figures and images for: The Ordospora colligata Genome: Evolution of Extreme Reduction in Microsporidia and Host-To-Parasite Horizontal Gene Transfer
Source: PubMed Central journal article supplement — mBio. 2015 Jan 13;6(1):e02400-14. doi: 10.1128/mBio.02400-14 (PMC4313915; doi:10.1128/mbio.02400-14), 2015-01-13

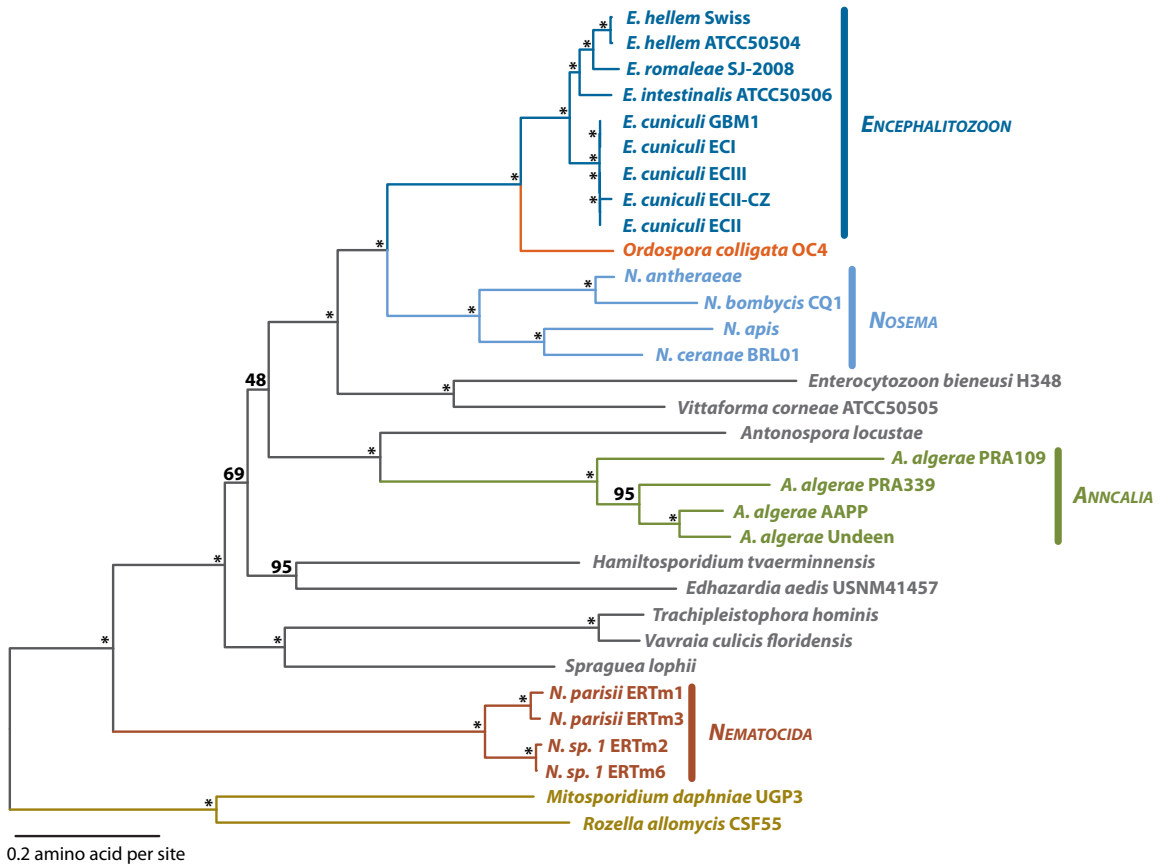

Supplement: mbo001152130sf1.pdf [file mbo001152130sf1.pdf]
